# Supplementary material
Source: PubMed Central journal article supplement (PMC3687702)
Supplement: supp_126.12.2704_JCS122242.pdf [file supp_126.12.2704_JCS122242.pdf]

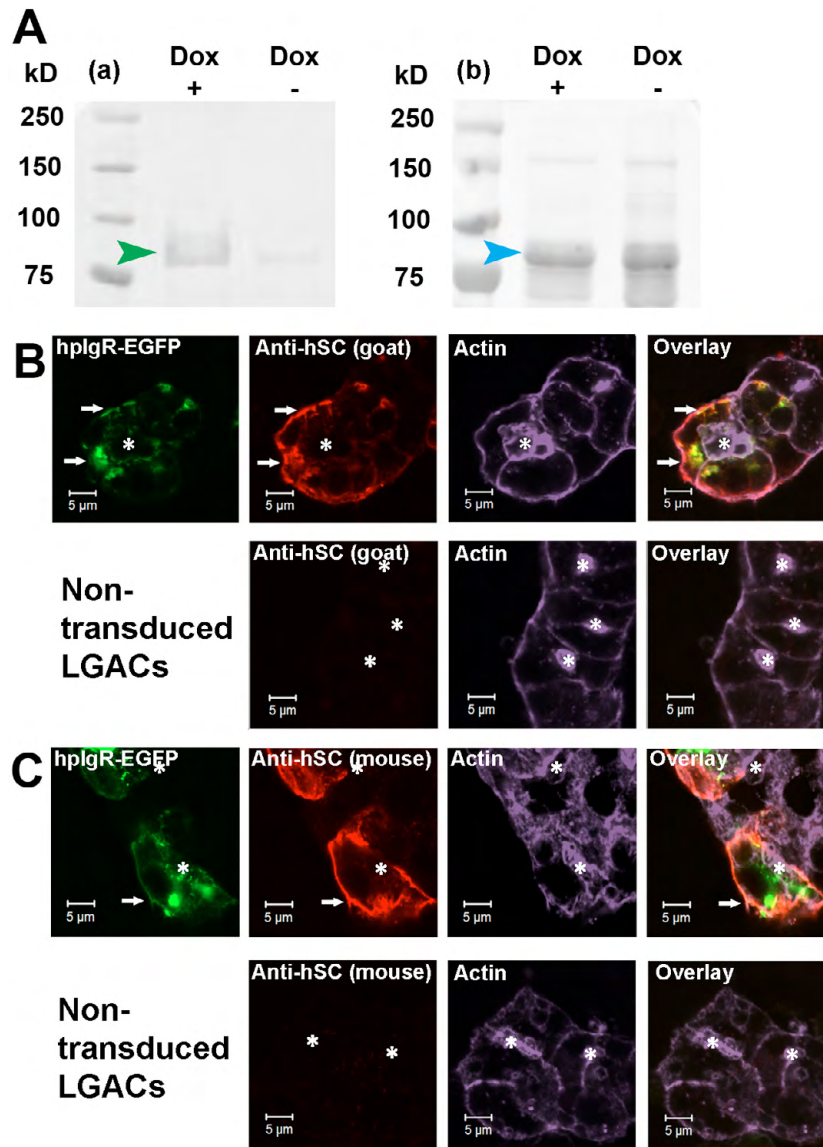

**Figure S1**

**Fig. S1. Goat and mouse anti-hSC antibodies distinguish hSC from endogenous rabbit SC.** A) LGACs were co-transduced with Ad hpIgR-EGFP and Adeno-X Tet-On®, with (+) or without (-) 0.1 µg/mL doxycycline. Supernatant from LGACs cultured overnight after transduction was concentrated with a Vivaspinn-500 concentrator, and analyzed by western blotting, using primary goat anti-hSC antibody (a) or sheep anti-rabbit SC serum (b), and secondary IRDye®800-conjugated donkey anti-goat or Alexa Fluor®-680-conjugated donkey anti-sheep antibodies, respectively. B) Live LGACs expressing hpIgR-EGFP or non-transduced LGACs were fixed, permeabilized and labeled with primary goat anti-hSC antibody, secondary Alexa Fluor®-568-conjugated donkey anti-goat antibody and Alexa Fluor®-647-conjugated Phalloidin. C) Live LGACs expressing hpIgR-EGFP or non-transduced LGACs were incubated with mouse anti-hSC antibody at 4°C for 1 hour. After rinsing, cells were fixed, permeabilized and labeled with secondary Alexa-Fluor-568-conjugated goat anti-mouse antibody and Alexa Fluor®-647-conjugated phalloidin. White arrows, colocalization; \*, lumena; scale bar: 5 µm.

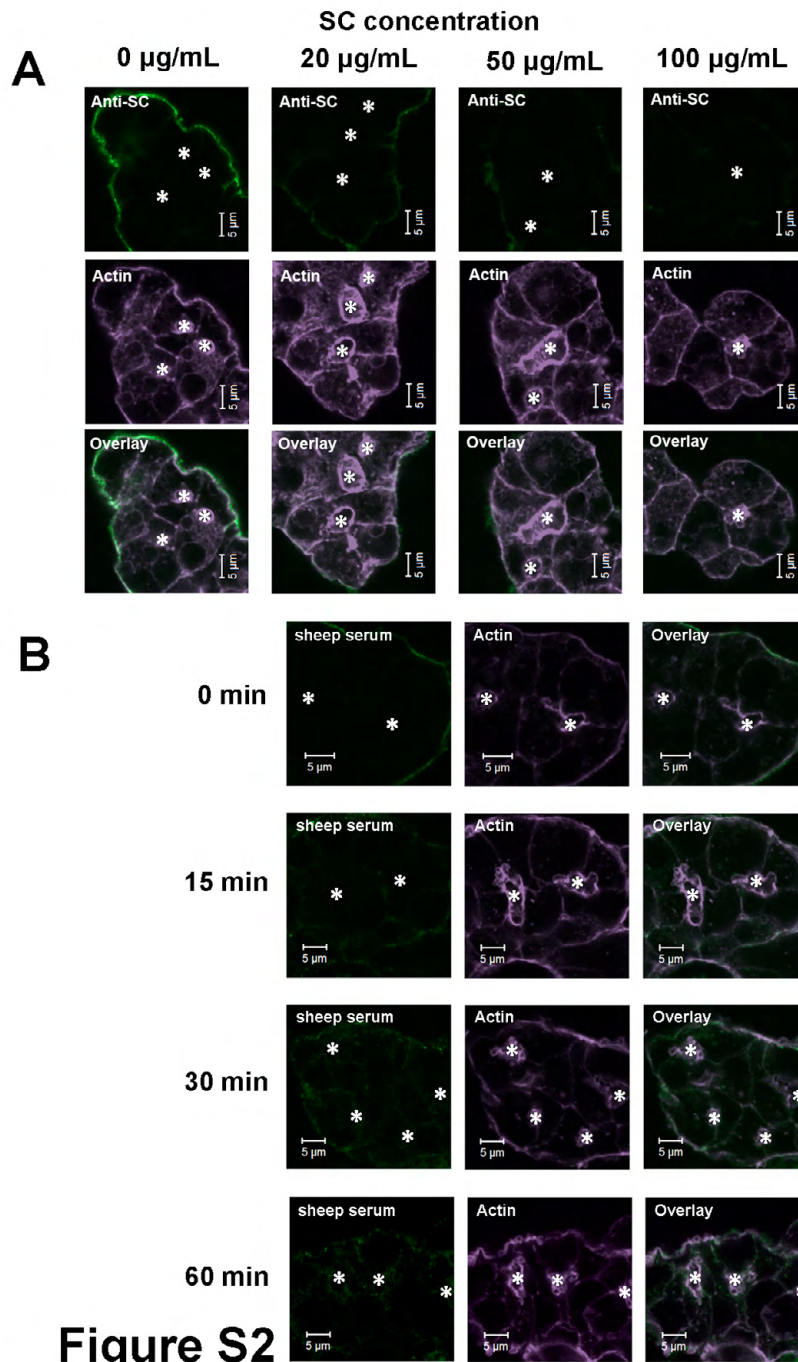

**Fig. S2. Sheep anti-SC serum specifically recognizes pIgR on the basolateral membrane of LGACs.** A) non-transduced LGACs were incubated with sheep anti-SC serum and purified rabbit SC at scaling up concentrations for 1 hour at 4°C. After extensive rinses, LGACs were fixed, permeabilized, and labeled with secondary Alexa-Fluor-488-conjugated donkey anti-sheep antibody and Alexa-Fluor-647-conjugated phalloidin. B) non-transduced LGACs were incubated with normal sheep serum for 1 hour at 4°C, rinsed and incubated at 37°C. Cells were fixed at time points indicated, permeabilized, and labeled with secondary Alexa-Fluor-488-conjugated donkey anti-sheep and Alexa Fluor®-647-conjugated phalloidin. \*, lumena; scale bar: 5  $\mu\text{m}$ .

**Fig. S3. Characterization of the regulated secretory pathway in LGACs.** A) LGACs were fixed, permeabilized and labeled with primary rabbit anti-Rab3D serum, primary mouse anti- $\gamma$ -adaptin antibody, secondary Alexa Fluor®-488-conjugated donkey anti-rabbit and Alexa Fluor®-568-conjugated goat anti-mouse antibodies, as well as Alexa Fluor®-647-conjugated phalloidin. Actin stained with Alexa Fluor®-647-conjugated phalloidin is displayed in purple in the overlay image. High magnification image displays a region of 10 x 10  $\mu$ m

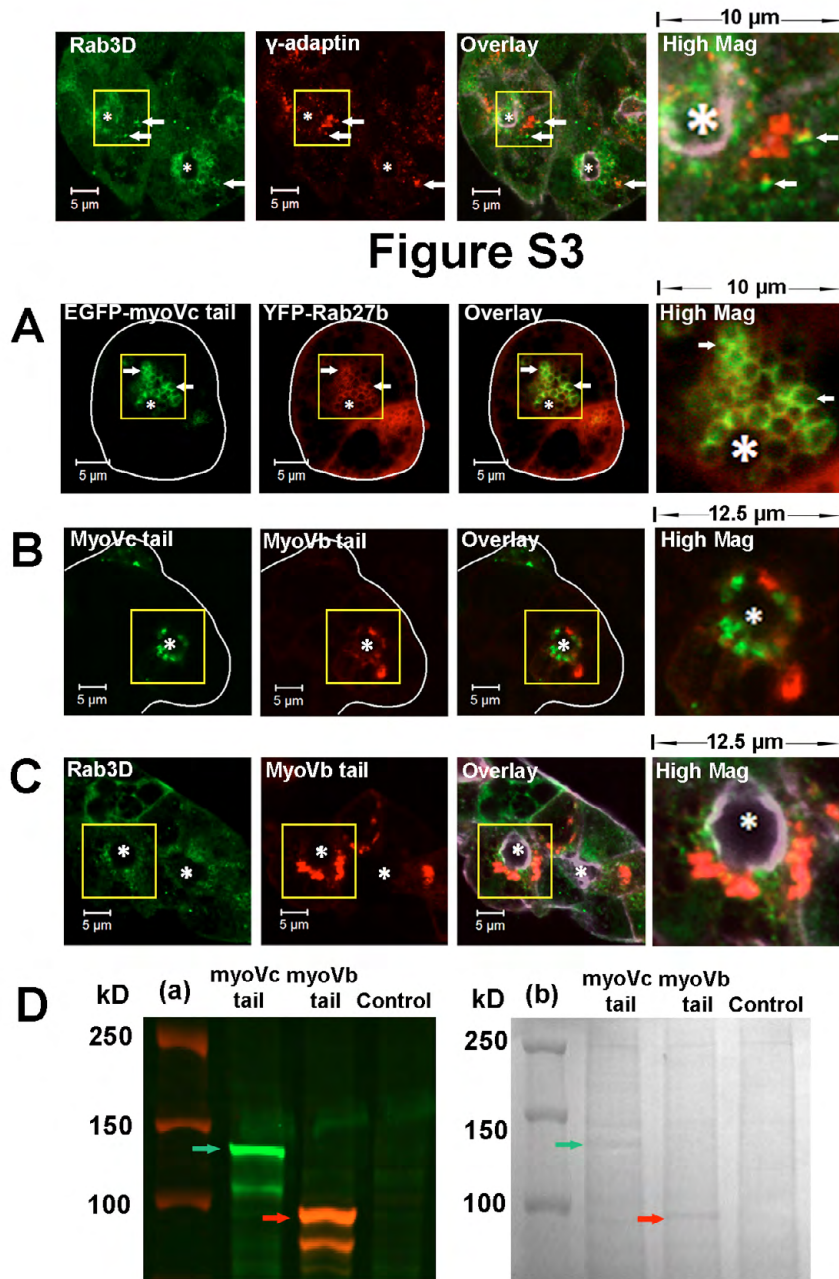

**Figure S4**

**Fig. S4. Characterization of over-expressed mCherry-myosin Vb tail and EGFP-myosin Vc tail in LGACs.** A) Live LGACs co-expressing EGFP-myosin Vc tail and YFP-Rab27b were observed by confocal fluorescence microscopy. Cellular outlines were obtained by comparing the respective image with the differential interference contrast (DIC) image. B) Live LGACs co-expressing hpIgR-EGFP and mCherry-myosin Vb tail were observed by confocal fluorescence microscopy. Cellular outlines were obtained by comparing the respective image with the differential interference contrast (DIC) image. C) LGACs expressing mCherry-myosin Vb tail were fixed, permeabilized and labeled with primary rabbit anti-Rab3D serum, secondary Alexa Fluor®-488-conjugated donkey anti-rabbit antibody and Alexa Fluor®-647-conjugated phalloidin. Actin stained with Alexa Fluor®-647-conjugated phalloidin is displayed in purple in the overlay image. High magnification image displays a region of 10 x 10  $\mu$ m (A) or 12.5 x 12.5  $\mu$ m (B, C) from the yellow boxed image to the left. \*, lumena; scale bar: 5  $\mu$ m. D) The LGACs expressing EGFP-myosin Vc tail, mCherry-myosin Vb tail, or LifeAct-TagRFP (control) were lysed with 4x SDS-PAGE loading buffer and resolved by 7.5% SDS-PAGE gels, which were subsequently used for further western blotting (a) or comassie blue staining (b). Primary rabbit anti-myosin Vc tail and goat anti-myosin Vb antibodies, as well as secondary IRDye®800-conjugated goat anti-rabbit and IRDye®700-conjugated donkey anti-goat antibodies were used for western blotting. Green arrow, EGFP-myosin Vc tail; red arrow, mCherry-myosin Vb tail.

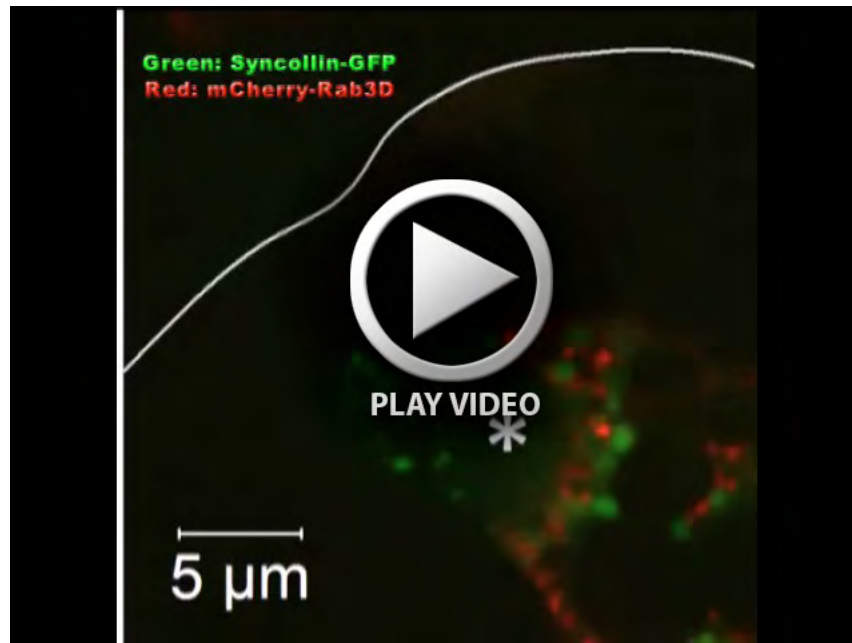

**Movie 1. Syncollin-GFP-enriched vesicles and mCherry-Rab3D-enriched vesicles in resting LGACs.** LGACs grown on a 35-mm glass-bottomed plate were co-transduced with Ad constructs on the second day of culture for co-expression of syncollin-GFP and mCherry-Rab3D. After 0.1  $\mu\text{g}/\text{mL}$  doxycycline induction overnight, LGACs were mounted in a 37°C incubation chamber and imaged. ~7.5-minute of real time is represented in this movie. \*, lumena; scale bar: 5  $\mu\text{m}$ .

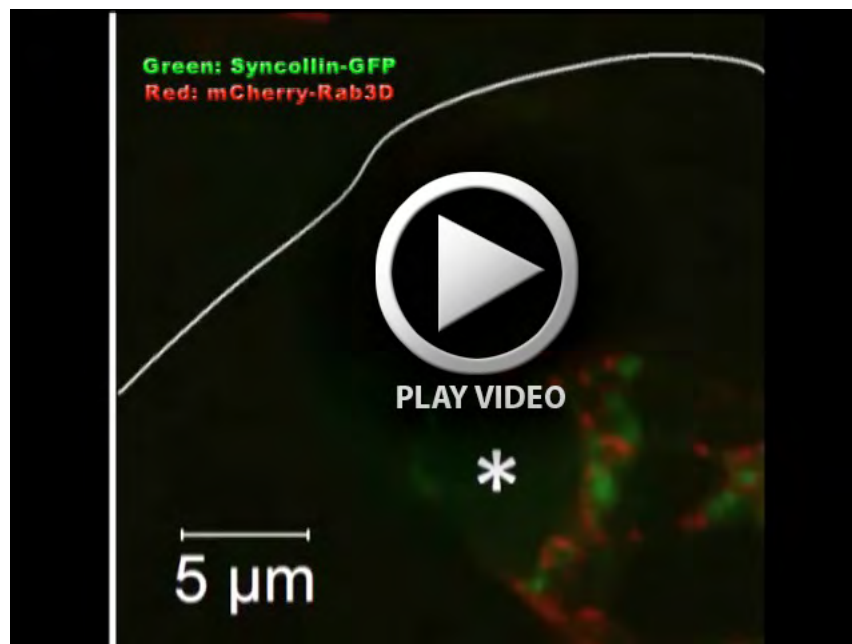

**Movie 2. Syncollin-GFP-enriched vesicles and mCherry-Rab3D-enriched vesicles in LGACs stimulated with CCh.** LGACs grown on a 35-mm glass-bottomed plate were co-transduced with Ad constructs on the second day of culture for co-expression of syncollin-GFP and mCherry-Rab3D. After 0.1  $\mu\text{g}/\text{mL}$  doxycycline induction overnight, LGACs were mounted in a 37°C incubation chamber and imaged immediately after application of 100  $\mu\text{M}$  CCh. ~7.5-minute of real time is represented in this movie. \*, lumena; scale bar: 5  $\mu\text{m}$ .

**Table S1. DNA and protein sequences**

**DNA sequence of the coding region of Ad plgR-EGFP construct:**

ATGCTGCTCTTCGTGCTCACCTGCCTGCTGGCGTCTTCCCAGCCATCTCCACGAAGAGTCCCATATTTGGTCCCAGGAGGTGAATA  
GTGTGGAAGGTAACACTAGTGTCCATCACGTGCTACTACCCACCCACCTCTGTCAACCGGCACACCCGGAAGTACTGGTGCCGGCAGG  
GAGCTAGAGGTGGCTGCATAAACCTCATCTCCTCGGAGGGTACGTCTCCAGCAAATATGCAGGCAGGGCTAACCTACCAACTTCC  
CGGAGAACGGCACATTTGGTGAACATTGCCAGCTGAGCCAGGATGACTCCGGGCGCTACAAGTGTGGCCTGGGCATCAATAGC  
CGAGGCCTGTCTTTGATGTCAGCCTGGAGGTCAGCCAGGGTCTGGGCTCTAAATGACACTAAAGTCTACACAGTGGACCTGGG  
CAGAACGGTGACCATCAACTGCCCTTCAAGACTGAGAATGCTCAAAAGAGGAAGTCTTGTACAAGCAGATAGGCCTGTACCCTGT  
GCTGGTCATCGACTCCAGTGGTTATGTAAATCCCAACTATACAGGAAGAATACGCCTTGATATTCAGGGTACTGGCCAGTTACTGTTC  
AGCGTTGTCATCAACCAACTCAGGCTCAGCGATGCTGGGCAGTATCTCTGCCAGGCTGGGGATGATTCCAATAGTAATAAGAAGAA  
TGCTGACCTCCAAGTGCTAAAGCCCGAGCCCGAGC

TGGTTTATGAAGACCTGAGGGGCTCAGTGACCTTCACTGTGCCCTGGGCCCTGAGGTGGCAAACGTGGCCAAATTTCTGTGCCGAC  
AGAGCAGTGGGGAAAAGTGTGACGTGGTTCGTCACACCTGGGGAAAGAGGGCCCCAGCCTTTGAGGGCAGGATCCTGCTCAACCC  
CCAGGACAAGGATGGCTCATTAGTGTGGTATCACAGGCCTGAGGAAGGAGGATGCAGGGCGCTACCTGTGTGGAGCCCATTTCG  
GATGGTCAGCTGCAGGAAGGCTCGCCTATCCAGGCCTGGCAACTCTTCGTCATGAGGAGTCCACGATTCCCCGCAGCCCCACTGTG  
GTGAAGGGGGTGGCAGGAGGCTCTGTGGCCGTGCTCTGCCCTACAACCGTAAGGAAAGCAAAGCATCAAGTACTGGTGTCTCTG  
GGAAGGGGCCAGAAATGGCCGCTGCCCTGCTGGTGGACAGCGAGGGGTGGGTTAAGGCCAGTACGAGGGCCGCTCTCCCTG  
CTGGAGGAGCCAGGCAACGGCACCTTCACTGTATCTCAACAGCTCACCAGCCGGGACGCCGCTTCTACTGGTGTCTGACCAAC  
GGGATACTCTCTGGAGGACCACCGTGGAGATCAAGATTATCGAAGGAGAACCAAACCTCAAGGTACCAGGGAATGTCACGGCTGT  
GCTGGGAGAGACTCTCAAGTCCCCTGTCACTTTCCATGCAAATTCTCTCGTACGAGAAATACTGGTGAAGTGAATAACACGGG  
CTGCCAGGCCCTGCCAGCCAAGACGAAGGCCCCAGCAAGGCCTTCGTGAACTGTGACGAGAACAGCCGGCTTGTCTCCCTGACCC  
TGAACCTGGTGACCAGGGCTGATGAGGGCTGGTACTGGTGTGGAGTGAAGCAGGGCCACTTCTATGGAGAGACTGCAGCCGTCTA  
TGTGGCAGTTGAAGAGAGGAAGGCAGCGGGTCCCGCATGTCAGCCTAGCGAAGGCAGACGCTGCTCCTGATGAGAAGGTGCTA  
GACTCTGGTTTTCGGGAGATTGAGAACAAGCCATTAGGATCCCAGGCTTTTTGTCAGAGGAAAAGCGGTGGCAGATACAAGAG  
ATCAAGCCGATGGGAGCAGAGCATCTGTGGATTCCGGCAGCTCTGAGGAACAAGGTGGAAGCTCCAGAGCGCTGGTCTCCACCTG  
GTGCCCTGGCCCTGGTGTGGCAGTGGGAGCCGTGGCTGTGGGGTGGCCAGAGCCCGGCACAGGAAGAACGTCGACCGAGTT  
TCAATCAGAAGCTACAGGACAGACATTAGCATGTCAGACTTCGAGAATCCAGGGAATTTGGAGCCAATGACAACATGGGAGCCTC  
TTCGATCACTCAGGAGACATCCCTCGGAGGAAAAGAAGAGTTTGTGCCACCACTGAGAGCACACAGAGACCAAAGAACCCAAGA  
AGGCAAAAAGGTCATCCAAGGAGGAAGCCGAGATGGCCTACAAGACTTCTGCTCCAGTCCAGCACCGTGGCCGCCGAGGCCCA  
GGACGGCCCCCAGGAAGCCTATCTCGAGCTCAAGCTTCGAATTCGAGTCGACGGTACCAGCGGGCCCGGGATCCACCGGTGCCA  
CCATGGTGTAGCAAGGGCAGGAGCTGTTACCGGGGTGGTGGCCATCCTGGTTCGAGCTGGACGGCGACGTAACGGCCACAAGTT  
CAGCGTGTCCGGCAGGGCAGGGCGATGCCACCTACGGCAAGCTGACCCTGAAGTTCATCTGCACCACGGCAAGCTGCCCGTGC  
CCTGGCCACCCTCGTGACCACCTGACCTACGGCGTGCAGTGTTCAGCCGCTACCCCGACCACATGAAGCAGCACGACTTCTTCAA  
GTCCGCTATGCCGAAGGCTACGTCCAGGAGCGCACCATCTTCTTCAAGGACGACGGCAACTACAAGACCCGCGCCGAGGTGAAGT  
TCGAGGGCGACACCCTGGTGAACCGCATCGAGCTGAAGGCATCGACTTCAAGGAGGACGGCAACATCCTGGGGCACAAGCTGGA  
GTACAACATAACAGCCACAACGTCTATATCATGGCCGACAAGCAGAAGAACGGCATCAAGGTGAAGTCAAGATCCGCCACAACA  
TCGAGGACGGCAGCGTGCAGCTCGCCGACCACTACCAGCAGAACACCCCCATCGGGCAGGCCCCGTGCTGCTGCCCGACAACCAC  
TACCTGAGCACCCAGTCCGCCCTGAGCAAAGACCCCAACGAGAAGCGCGATCACATGGTCTGCTGGAGTTCGTGACCGCCGCCGG  
GATCACTCTCGGCATGGACGAGCTGTACAAGTAAAGCGGCCG

3090bp

**Sequence of the translated plgR-EGFP**

MLLFVLTCLLAVFPAISTKSPIFGPEEVNSVEGNSVSITCYPPTSVMNRHTRKYWCRQGARGGCITLISSEGYVSSKYAGRANLTFNPFNGTFV  
VNIAQLSQDDSGRYKCGLINSRGLSFDVSLVSEQPGLNDTKVYTVDLGRVTINCPFKTENAQRKRSLYKQIGLYPVLVIDSSGYVNPNY  
TGRIRLDIQGTGQLLFSVVINQLRLSDAGQYLCQAGDDSNKKNADLQVLKPEPELVYEDLRGSVTFHCALGPEVANVAKFLCRQSSGEN  
CDVVVNTLTKRAPAFEGRILLNPQDKDGSFVITGLRKEDAGRYLCGAHSDGQLQEGSPIQAWQLFVNEESTIPRSPTVVKGVAGGSVA  
VLCYPYNRKESKSIKYWCLWEGAQNGRCPDLLVDSEGWVKAQYEGRLSLEPEPNGTFTVILNQLTSRDAGFYWCLTNGDTLWRTTVEIKIIE

GEPNLKVPGNVTAVLGETLKVPCHPCKFSSYEKYWCKWNNTGCQALPSQDEGPSKAFVNCDENSRLVSLTLNLVTRADEGWYWCGVK  
QGHFYGETAAVYVAVEERKAAGSRDVS LAKADAAPDEKVLDSGFREIENKAIQDPRLFAEEKAVADTRDQADGSRASVDSGSSEEQGGSS  
RALVSTLVPLGLVLAVGAVAVGVARARHRKNVDRVSIRSRTDISMSDFENSREFGANDNMGASSITQETSLGGKEEFVATTESTTETKEP  
KKAKRSSKEEAEMAYKDFLLQSSTVAEEAQDGPQEAYLELKLRLIQSTVPRARDPPVATMVSKGEEFLTGVVPILVELDGDVNGHKFSVSG  
EGEGDATYGLTLKFICTTGKLPVPWPTLVTTLYGVQCFSRYPDHMKQHDFFKSAMPEGYVQERTIFFKDDGNYKTRAEVKFEGDTLVN  
RIELKIDFKEDGNILGHKLEYNYNSHNVYIMADKQKNGIKVNFKIRHNIEDGSVQLADHYQQNTPIGDGPVLLPDNHYLSTQSALS KDPN  
EKRDHMLLEFVTAAGITLGMDELYK-

1026 AA

**DNA sequence of the coding region of Ad mCherry-Rab3D construct:**

ACGCGTATGGTGAGCAAGGGCGAGGAGGATAACATGGCCATCATCAAGGAGTTCATGCGCTTCAAGGTGCACATGGAGGGCTCCG  
TGAACGGCCACGAGTTCGAGATCGAGGGCGAGGGCGAGGGCCGCCCTACGAGGGCACCCAGACCCGAAGCTGAAGGTGACCA  
AGGGTGGCCCCCTGCCCTTCGCCTGGGACATCCTGTCCCCTCAGTTCATGTACGGCTCAAGGCCTACGTGAAGCACCCCGCCGACA  
TCCCGACTACTTGAAGCTGTCTTCCCGAGGGCTTCAAGTGGGAGCGCGTGATGAACTTCGAGGACGGCGCGTGTTGACCGTG  
ACCCAGGACTCCTCCCTGCAGGACGGCGAGTTCATCTACAAGGTGAAGCTGCGCGGCACCAACTTCCCCTCCGACGGCCCCGTAATG  
CAGAAGAAGACCATGGGCTGGGAGGCCTCCTCCGAGCGGATGTACCCCGAGGACGGCGCCCTGAAGGGCGAGATCAAGCAGAGG  
CTGAAGCTGAAGGACGGCGGCCACTACGACGCTGAGGTCAAGACCACCTACAAGGCCAAGAAGCCCGTGCAGCTGCCCGGCGCCT  
ACAACGTCAACATCAAGTTGGACATCACCTCCACAACGAGGACTACACCATCGTGGAAACAGTACGAACGCGCCGAGGGCCGCCAC  
TCCACCGCGGCATGGACGAGCTGTACAAGCTCGAGGGAGGATCAGGAGGAGGATCAGGAGGAGGATCAGGAATGGCTTCTGCA  
GGAGACCCCCCGCGGGCCCCGGGACGCCGCAGACCAGAACTTCGACTACATGTTCAAGATTCTCATCATCGGCAACAGCAGCGT  
GGGCAAGACCTCCTTCTGTTCCGCTACGCCGACGACTCCTTACGCCCGCCTTCTGTCAGCACCGTGGGCATCGACTTCAAGGTCAA  
GACCGTCTACCGCCACGACAAGAGGATCAAGCTGCAGATCTGGGACACGGCCGGCCAGGAGCGGTACCGCACCATCACCACGGCC  
TACTACCGCGGGGCCATGGGCTTCTGCTGCTGATGACATCGCCAACCAGGAGTCTTCAACGCCGTGCAGGACTGGGCCACGCA  
GATCAAGACCTACTCCTGGGACAACGCCAGGTATCCTGGTGGGCAACAAGTGTGACCTGGAGGACGAGCGGGCCGTGCCTGCC  
GAGGACGGCCGGAGGCTGGCCGACGACCTGGGTGAGTACGAGCAAACCGAGGCTAAGACGCTCAACCCACGTCCCACCTTCGAGC  
GCCTGGTGGACTCCATCTGCGAGAAGATGAATGAGTGCCTGGAACCCAGCTCCAGCCCCGGCAGCAACGGGAAGGGCCCCGCCCT  
GGGGGACGCCCCGCCCGCAGCCAGCAGCTGTGGCTGCTAGGTCGAC

1416 bp

**Sequence of the translated mCherry-Rab3D**

MVSKGEEDNMAIIKEFMRFKVHMEGSVNGHEFEIEGEGRPYEGTQTAKLKVTKGGPLPFAWDILSPQFMYGSKAYVKHPADIPDYLK  
LSFPEGFKWERVMNFEDGGVVTVTQDSSLQDGEFIYKVKLRGTNFPDGPVMQKKTMGWEASSERMYPEDGALKGEIKRKLKLDGG  
HYDAEVKTTYKAKKPVQLPGAYNVNIKLDITSHNEDYTIVEQYERAEGRHSTGGMDELYKLDGGSGGGSGGSGMASAGDPPAGPRDA  
ADQNFDMFKILIIGNSSVGKTSFLFRYADDSFTPAFVSTVIGIDFKVKTYYRHDKRIKLIWDTAGQERYRTITTAAYRGAMGFLVYDIANQ  
ESFNAVQDWATQIKTYSWDNAQVILVGNKCDLEDERAVPAEDGRRRLADDLGEYEQTEAKTLNPRPTFERLVDSICEKMNESLEPSSSPGS  
NGKGPALGDAPPPQPSSCGC-

467AA

Theoretical pI/Mw: 5.13 / 51706.88
